# Supplementary material for: Metabolomics of sebum reveals lipid dysregulation in Parkinson’s disease
Source: PubMed Central journal article supplement (PMC7952564; doi:10.1038/s41467-021-21669-4), 2021-03-11
Supplement: 41467_2021_21669_MOESM1_ESM.pdf [file 41467_2021_21669_MOESM1_ESM.pdf]

## **Metabolomics of sebum reveals lipid dysregulation in Parkinson's disease**

**Eleanor Sinclair<sup>1</sup>, Drupad K Trivedi<sup>1</sup>, Depanjan Sarkar<sup>1</sup>, Caitlin Walton-Doyle<sup>1</sup>, Joy Milne<sup>1</sup>, Tilo Kunath<sup>2</sup>, Anouk M. Rijs<sup>3</sup>, Rob M. A. de Bie<sup>4</sup>, Royston Goodacre<sup>5</sup> Monty Silverdale<sup>6</sup> and Perdita Barran\*<sup>1</sup>**

<sup>1</sup>Manchester Institute of Biotechnology, School of Chemistry, The University of Manchester, Princess Street, Manchester, UK, M1 7DN

<sup>2</sup>Institute for Stem Cell Research, School of Biological Sciences, The University of Edinburgh, Edinburgh UK, EH16 4UU

<sup>3</sup>Division of BioAnalytical Chemistry, AIMMS Amsterdam Institute of Molecular and Life Sciences, Vrije Universiteit Amsterdam, De Boelelaan 1108, 1081 HZ Amsterdam, The Netherlands

<sup>4</sup>Amsterdam University Medical Centers, University of Amsterdam, Department of Neurology, Amsterdam Neuroscience, Meibergdreef 9, 1105 AZ Amsterdam, The Netherlands

<sup>5</sup>Institute of Systems, Molecular and Integrative Biology, Department of Biochemistry and Systems Biology, University of Liverpool, Crown Street, Liverpool L69 7ZB

<sup>6</sup>Department of Neurology, Salford Royal Foundation Trust, Manchester Academic Health Science Centre, University of Manchester, UK

### **Supplementary Information**

## Table of Contents

|                                                                                                                                                                                                                             |    |
|-----------------------------------------------------------------------------------------------------------------------------------------------------------------------------------------------------------------------------|----|
| <b>Table S1.</b> Statistical significance between drug naïve PD and control cohorts and medicated PD and control cohorts .....                                                                                              | 3  |
| <b>Table S2.</b> PLS-DA classification results for gender separated models of drug naïve PD vs. control and medicated PD vs. control .....                                                                                  | 4  |
| <b>Figure S1.</b> PLS-DA classification model output for medicated PD vs. drug naïve PD, when medicated PD is the 'positive' predictive class, .....                                                                        | 5  |
| <b>Figure S2.</b> Bar charts displaying the area under the curve (AUC) from univariate ROC analysis .....                                                                                                                   | 6  |
| <b>Table S3A.</b> Putative annotations supported by MS/MS fragmentation data of VIP compounds common to both drug naïve PD vs. control and medicated PD vs. control analyses (VIP > 1). .....                               | 7  |
| <b>Table S3B.</b> A list of the database matches based upon accurate mass (Lipid Maps and METLIN, 10 ppm) for VIP compounds common to both drug naïve PD vs. control and medicated PD vs. control analyses (VIP > 1). ..... | 7  |
| <b>Table S4A.</b> Putative annotations supported by MS/MS fragmentation data for VIP compounds found only in drug naïve PD vs. control analysis (VIP > 1). .....                                                            | 9  |
| <b>Table S4B.</b> A list of the database matches based upon accurate mass (Lipid Maps and METLIN, 10 ppm) for VIP compounds found only in drug naïve PD vs. control analysis (VIP > 1). .....                               | 9  |
| <b>Table S5A.</b> Putative annotations supported by MS/MS fragmentation data of VIP compounds found only in medicated PD vs. control analysis (VIP > 1). .....                                                              | 11 |
| <b>Table S5B.</b> A list of the database matches based upon accurate mass (Lipid Maps and METLIN, 10 ppm) for VIP compounds found only in drug naïve PD vs. control analysis (VIP > 1). .....                               | 12 |
| <b>Figure S3.</b> Pearson's correlation matrix displaying the relationship between the number of alcohol units consumed per participant and the intensity of each corresponding VIP compound from PLS-DA modelling. ....    | 14 |
| <b>Table S6.</b> Mummichog output from MetaboAnalyst analysis for pathways with $p < 0.05$ in drug naïve PD vs. control cohorts .....                                                                                       | 15 |
| <b>Table S7.</b> Mummichog output from MetaboAnalyst analysis for pathways with $p < 0.05$ in medicated PD vs. control cohorts .....                                                                                        | 16 |
| <b>Table S8.</b> Details of the collecting sites in the UK/NL and the lead PI at each site.....                                                                                                                             | 17 |

**Table S1.** Statistical significance between drug naïve PD and control cohorts and medicated PD and control cohorts

|                                       | Drug Naïve PD<br>- Control | Significant | Medicated PD<br>Control | - | Significant |
|---------------------------------------|----------------------------|-------------|-------------------------|---|-------------|
| Age <sup>a</sup>                      | 5.73x10 <sup>-11</sup>     | Yes         | 6.25x10 <sup>-14</sup>  |   | Yes         |
| BMI (kg/m <sup>2</sup> ) <sup>a</sup> | 0.640                      | No          | 0.880                   |   | No          |
| Gender <sup>b</sup>                   | 0.045                      | Yes         | 0.042                   |   | Yes         |
| Alcohol Intake <sup>b</sup>           | 0.192                      | No          | 0.015                   |   | Yes         |
| Smoker <sup>b,c</sup>                 | 0.837                      | No          | 0.006                   |   | Yes         |

<sup>a</sup> Mann Whitney non-parametric U test (two-tailed) used to determine significance, *p*-values were calculated at the 0.05 confidence level

<sup>b</sup> Chi-squared test implemented for categorical variables

<sup>c</sup> Fisher's exact test employed to calculate significance of smokers vs. non-smokers within medicated PD and control groups

**Table S2.** PLS-DA classification results for gender separated models of drug naïve PD vs. control and medicated PD vs. control

| PLS-DA classification rates | Male (n=163)              |                          | Female (n=111)            |                          |
|-----------------------------|---------------------------|--------------------------|---------------------------|--------------------------|
|                             | Drug Naïve PD vs. Control | Medicated PD vs. Control | Drug Naïve PD vs. Control | Medicated PD vs. Control |
| Averaged CCR                | 68.9%                     | 60.2%                    | 57.1%                     | 70.2%                    |
| Sensitivity                 | 56.4%                     | 65.5%                    | 63.5%                     | 76.6%                    |
| Specificity                 | 62.6%                     | 41.7%                    | 49.0%                     | 52.3%                    |

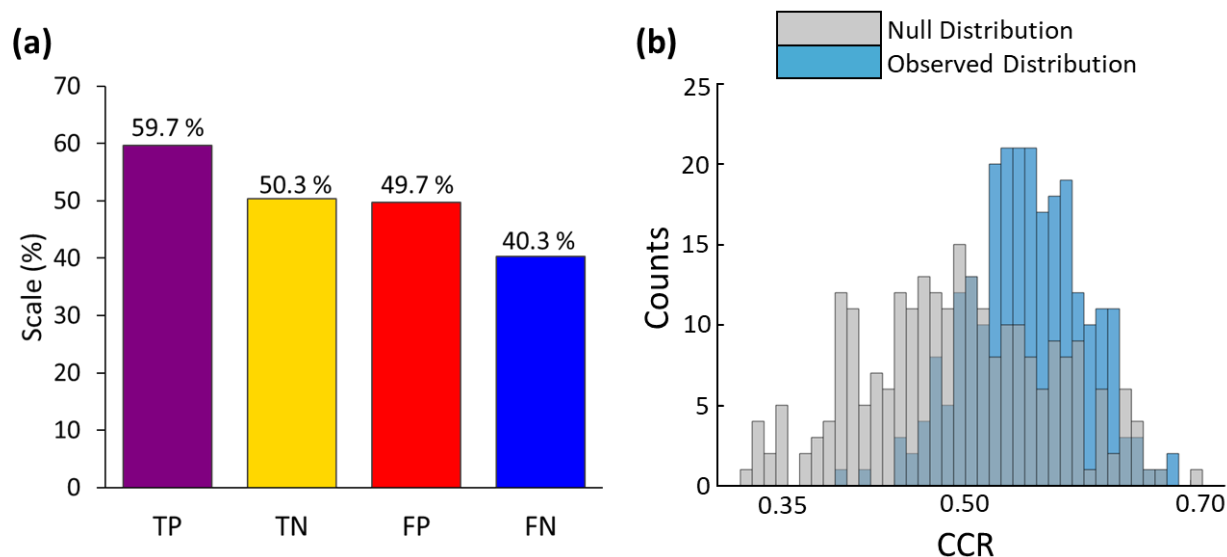

**Figure S1.** PLS-DA classification model output for medicated PD vs. drug naïve PD, when medicated PD is the 'positive' predictive class, (a) bar chart displaying the true positive, true negative, false positive and false negative rates from PLS-DA modelling, (b) frequency histogram to present the correct classification rate of bootstrap validation ( $n=250$  resampling models), grey bars represent the null distribution and blue bars signify the observed distribution.

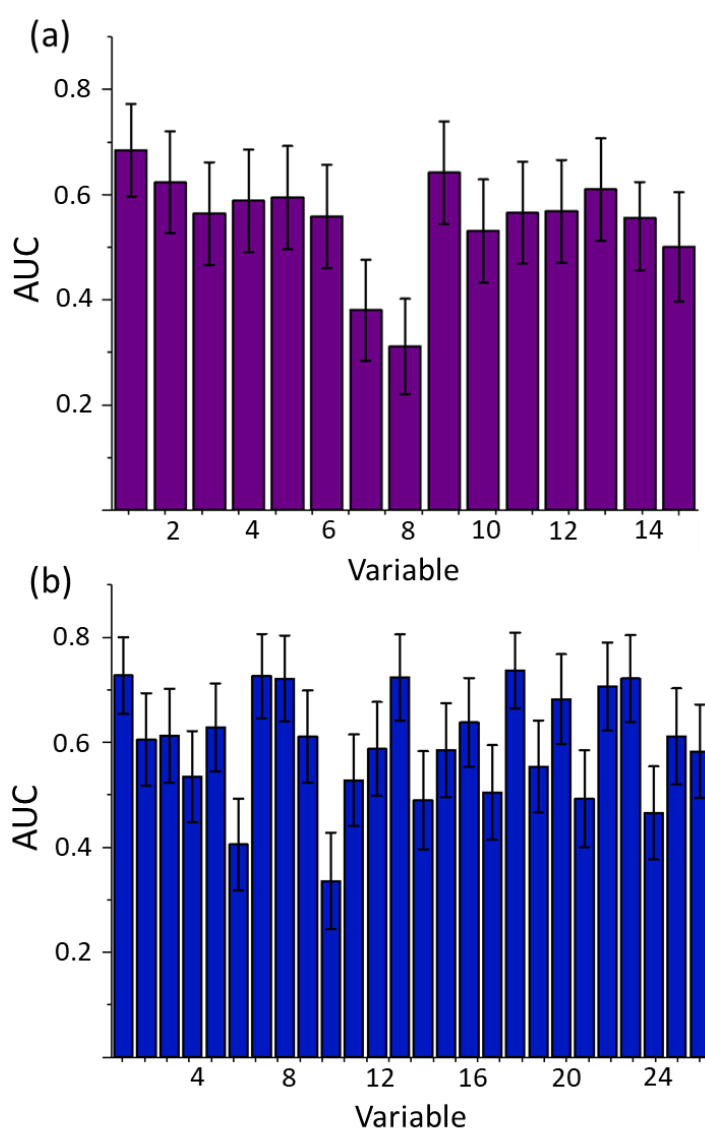

**Figure S2.** Bar charts displaying the area under the curve (AUC) from univariate ROC analysis for (a) drug naïve PD vs. control ROC analysis for variables with VIP > 1 (variables,  $n=15$ ) using PLS-DA variable ranking, (b) medicated PD vs. control analysis ROC analysis for variables with VIP > 1 (variables,  $n=26$ ) using PLS-DA variable ranking. Data are presented as mean AUC value with error bars representing the minima and maxima values of the 95% CI range

Variables correspond to VIP features as follows:

(a) #1.  $m/z$  368.4242, #2.  $m/z$  550.6277, #3.  $m/z$  666.6370, #4.  $m/z$  638.6067, #4.  $m/z$  256.2645, #5.  $m/z$  522.5965, #6.  $m/z$  668.6178, #7.  $m/z$  764.568, #8.  $m/z$  194.1396, #9.  $m/z$  825.6939, #10.  $m/z$  358.3677, #11.  $m/z$  692.6168, #12.  $m/z$  610.5763, #13.  $m/z$  494.5656, #14.  $m/z$  430.3881, #15.  $m/z$  414.4308

(b) #1.  $m/z$  368.4242, #2.  $m/z$  666.6370, #3.  $m/z$  638.6067, #4.  $m/z$  256.2645, #5.  $m/z$  550.6277, #6.  $m/z$  764.5681, #7.  $m/z$  830.7349, #8.  $m/z$  825.6939, #9.  $m/z$  610.5763, #10.  $m/z$  194.1396, #11.  $m/z$  283.2885, #12.  $m/z$  338.3426, #13.  $m/z$  839.7100, #14.  $m/z$  641.4795, #15.  $m/z$  664.6213, #16.  $m/z$  402.3932, #17.  $m/z$  894.6996, #18.  $m/z$  340.3935, #19.  $m/z$  358.3677, #20.  $m/z$  369.3836, #21.  $m/z$  553.43, #22.  $m/z$  827.7101, #23.  $m/z$  788.6888, #24.  $m/z$  792.5955, #25.  $m/z$  414.4308, #26.  $m/z$  636.5911

**Table S3A.** Putative annotations supported by MS/MS fragmentation data of VIP compounds common to both drug naïve PD vs. control and medicated PD vs. control analyses (VIP > 1).

| Putative Annotation | Formula                                         | Adduct                              | Score | Fragmentation Score | Isotope Similarity | Neutral Mass | <i>m/z</i> | $\Delta$ ppm | Expression Drug Naïve PD (Fold Change) | Expression Medicated PD (Fold Change) |
|---------------------|-------------------------------------------------|-------------------------------------|-------|---------------------|--------------------|--------------|------------|--------------|----------------------------------------|---------------------------------------|
| TG(50:5)            | C <sub>53</sub> H <sub>92</sub> O <sub>6</sub>  | [M+H] <sup>+</sup>                  | 47.9  | 60.3                | 83.43              | 824.6894     | 825.6939   | 3.4          | ↓ (0.77)                               | ↓ (0.64)                              |
| HexCer(36:2)        | C <sub>42</sub> H <sub>79</sub> NO <sub>9</sub> | [M+Na] <sup>+</sup>                 | 46.5  | 47.0                | 90.65              | 741.5755     | 764.5681   | 4.4          | ↑ (1.15)                               | ↑ (1.10)                              |
| Cer(42:0)           | C <sub>42</sub> H <sub>85</sub> NO <sub>5</sub> | [M-H <sub>2</sub> O+H] <sup>+</sup> | 45.7  | 41.7                | 90.00              | 683.6428     | 666.6370   | 3.7          | ↓ (0.60)                               | ↓ (0.47)                              |
| Cer(40:0)           | C <sub>40</sub> H <sub>81</sub> NO <sub>5</sub> | [M-H <sub>2</sub> O+H] <sup>+</sup> | 46.0  | 37.5                | 92.83              | 655.6115     | 638.6067   | 2.3          | ↓ (0.61)                               | ↓ (0.47)                              |
| Cer(38:1)           | C <sub>38</sub> H <sub>75</sub> NO <sub>4</sub> | [M+H] <sup>+</sup>                  | 49.6  | 50.3                | 97.66              | 609.5696     | 610.5763   | 1.0          | ↓ (0.63)                               | ↓ (0.48)                              |

TG (Triacylglycerol); HexCer (Hexosylceramide); Cer (Ceramide)

Fold Change = PD (Intensity) / Control (Intensity); where PD refers to Drug Naïve or Medicated cohorts, respectively

**Table S3B.** A list of the database matches based upon accurate mass (Lipid Maps and METLIN, 10 ppm) for VIP compounds common to both drug naïve PD vs. control and medicated PD vs. control analyses (VIP > 1).

| Measured Feature    | Database Matches         | Formula                                        | Adduct                            | Neutral Mass | $\Delta$ ppm | Expression Drug Naïve PD (Fold Change) | Expression Medicated PD (Fold Change) | Lipid Maps | METLIN |
|---------------------|--------------------------|------------------------------------------------|-----------------------------------|--------------|--------------|----------------------------------------|---------------------------------------|------------|--------|
| <i>m/z</i> 414.4308 | FA(26:0)*                | C <sub>26</sub> H <sub>52</sub> O <sub>2</sub> | [M+NH <sub>4</sub> ] <sup>+</sup> | 396.3967     | 0.6          | ↑ (1.23)                               | ↓ (0.84)                              | ✓          | ✓      |
|                     | Methyl pentacosanoate**  |                                                |                                   |              |              |                                        |                                       |            | ✓      |
| <i>m/z</i> 358.3677 | FA(22:0)*                | C <sub>22</sub> H <sub>44</sub> O <sub>2</sub> | [M+NH <sub>4</sub> ] <sup>+</sup> | 340.3341     | 0.7          | ↓ (0.81)                               | ↓ (0.78)                              | ✓          | ✓      |
| <i>m/z</i> 194.1396 | FA(8:0);O <sub>2</sub> * | C <sub>8</sub> H <sub>16</sub> O <sub>4</sub>  | [M+NH <sub>4</sub> ] <sup>+</sup> | 176.1049     | 4.7          | ↑ (1.74)                               | ↑ (1.78)                              | ✓          | ✓      |
|                     | L-Cladinose              |                                                |                                   |              |              |                                        |                                       |            | ✓      |
|                     | Metaldehyde <sup>†</sup> |                                                |                                   |              |              |                                        |                                       |            | ✓      |

|                     |   |   |   |   |   |          |          |   |  |
|---------------------|---|---|---|---|---|----------|----------|---|--|
| <i>m/z</i> 550.6277 | - | - | - | - | - | ↑ (1.33) | ↑ (1.10) | - |  |
| <i>m/z</i> 368.4242 | - | - | - | - | - | ↓ (0.15) | ↓ (0.14) | - |  |

FA (Fatty Acyl)

Lipid ID \* corresponds to a Lipid Maps Structure Database (LMSD) hit which comprises biologically relevant lipids to mammalian species. All other database matches correspond to Lipid Maps Computationally-generated species (COMP\_DB) and METLIN as indicated in the final two columns

The number of oxygen atoms that are not included in the class-specific functional group is added after the semi-colon, where applicable

\*\*Fatty acid methyl ester

<sup>†</sup>Pesticide

Fold Change = PD (Intensity) / Control (Intensity); where PD refers to Drug Naïve or Medicated cohorts, respectively



**Table S4A.** Putative annotations supported by MS/MS fragmentation data for VIP compounds found only in drug naïve PD vs. control analysis (VIP > 1).

| Putative Annotation | Formula                                        | Adduct                            | Score | Fragmentation Score | Isotope Similarity | Neutral Mass | <i>m/z</i> | Δ ppm | Expression Drug Naïve PD (Fold Change) |
|---------------------|------------------------------------------------|-----------------------------------|-------|---------------------|--------------------|--------------|------------|-------|----------------------------------------|
| DG(38:1)            | C <sub>41</sub> H <sub>78</sub> O <sub>5</sub> | [M+NH <sub>4</sub> ] <sup>+</sup> | 48.6  | 50.4                | 95.69              | 650.5849     | 668.6178   | 1.4   | ↓ (0.81)                               |

DG (Diacylglycerol)

Fold Change = Drug Naïve PD (Intensity) / Control (Intensity)

**Table S4B.** A list of the database matches based upon accurate mass (Lipid Maps and METLIN, 10 ppm) for VIP compounds found only in drug naïve PD vs. control analysis (VIP > 1).

| Measured Feature    | Database Matches           | Formula                                         | Adduct                            | Neutral Mass | Δ ppm | Expression Drug Naïve PD (Fold Change) | Lipid Maps                                      | METLIN             |
|---------------------|----------------------------|-------------------------------------------------|-----------------------------------|--------------|-------|----------------------------------------|-------------------------------------------------|--------------------|
| <i>m/z</i> 430.3881 | DG O(22:1)                 | C <sub>25</sub> H <sub>48</sub> O <sub>4</sub>  | [M+NH <sub>4</sub> ] <sup>+</sup> | 412.3547     | 2.3   | ↓ (0.75)                               | ✓                                               |                    |
|                     | FA(25:1);O <sub>2</sub> *  |                                                 |                                   |              |       |                                        | ✓                                               |                    |
|                     | MG(22:1)                   |                                                 |                                   |              |       |                                        | ✓                                               |                    |
|                     | MG O(22:2);O               |                                                 |                                   |              |       |                                        | ✓                                               | ✓                  |
|                     | NAE(23:0)                  |                                                 |                                   |              |       |                                        | C <sub>25</sub> H <sub>51</sub> NO <sub>4</sub> | [M+H] <sup>+</sup> |
| <i>m/z</i> 692.6168 | Cer(41:0);O <sub>4</sub> * | C <sub>41</sub> H <sub>83</sub> NO <sub>5</sub> | [M+Na] <sup>+</sup>               | 669.6271     | 0.7   | ↓ (0.53)                               | ✓                                               | ✓                  |
|                     | DG(40:3)*                  | C <sub>43</sub> H <sub>78</sub> O <sub>5</sub>  | [M+NH <sub>4</sub> ] <sup>+</sup> | 674.5849     | 2.8   |                                        | ✓                                               | ✓                  |
|                     | DG O(40:4);O               |                                                 |                                   |              |       |                                        | ✓                                               |                    |
|                     | TG O(40:3)                 |                                                 |                                   |              |       |                                        | ✓                                               |                    |
|                     | Cer(43:3);O <sub>4</sub>   | C <sub>43</sub> H <sub>81</sub> NO <sub>5</sub> | [M+H] <sup>+</sup>                | 667.6115     | 2.8   |                                        | ✓                                               |                    |
|                     | Acer(43:2);O <sub>3</sub>  |                                                 |                                   |              |       |                                        | ✓                                               |                    |

|                     |               |                                                 |                                     |          |     |          |   |  |
|---------------------|---------------|-------------------------------------------------|-------------------------------------|----------|-----|----------|---|--|
|                     | Cer(43:2);O5  | C <sub>43</sub> H <sub>83</sub> NO <sub>6</sub> | [M-H <sub>2</sub> O+H] <sup>+</sup> | 709.6220 | 2.8 |          | ✓ |  |
|                     | ACer(43:1);O4 |                                                 |                                     |          |     |          | ✓ |  |
| <i>m/z</i> 522.5965 | -             | -                                               | -                                   | -        | -   | ↓ (0.62) |   |  |
| <i>m/z</i> 494.5656 | -             | -                                               | -                                   | -        | -   | ↓ (0.45) |   |  |

DG O (Alkylacylglycerol); FA (Fatty Acyl); MG (Monoacylglycerol); MG O (Monoalkylglycerol); NAE (N-Acyl Ethanolamine); Cer (Ceramide); DG (diacylglycerol); TG O (Alkyldiacylglycerol); ACer (Acyl ceramide)

The number of oxygen atoms that are not included in the class-specific functional group is added after the semi-colon, where applicable

Lipid ID \* corresponds to a Lipid Maps Structure Database (LMSD) hit which comprises only biologically relevant lipids to mammalian species. All other database matches correspond to Lipid Maps Computationally-generated species (COMP\_DB) and METLIN as indicated in the final two columns

Fold Change = Drug Naive PD (Intensity) / Control (Intensity)

**Table S5A.** Putative annotations supported by MS/MS fragmentation data of VIP compounds found only in medicated PD vs. control analysis (VIP > 1).

| Putative Annotation | Formula                                          | Adduct                              | Score | Fragmentation Score | Isotope Similarity | Neutral Mass | <i>m/z</i> | $\Delta$ ppm | Expression Medicated PD (Fold Change) |
|---------------------|--------------------------------------------------|-------------------------------------|-------|---------------------|--------------------|--------------|------------|--------------|---------------------------------------|
| HexCer(44:1)        | C <sub>50</sub> H <sub>97</sub> NO <sub>10</sub> | [M+Na] <sup>+</sup>                 | 53.9  | 71.4                | 98.15              | 871.7112     | 894.6996   | 1.0          | ↓ (0.99)                              |
| TG(50:2)            | C <sub>53</sub> H <sub>98</sub> O <sub>6</sub>   | [M+Na] <sup>+</sup>                 | 44.8  | 38.9                | 86.88              | 830.7363     | 853.7241   | 1.8          | ↓ (0.64)                              |
| TG(49:2)            | C <sub>52</sub> H <sub>96</sub> O <sub>6</sub>   | [M+Na] <sup>+</sup>                 | 44.6  | 30.0                | 93.56              | 816.7207     | 839.7100   | 0.1          | ↓ (0.64)                              |
| TG(48:1)            | C <sub>51</sub> H <sub>96</sub> O <sub>6</sub>   | [M+Na] <sup>+</sup>                 | 49.6  | 49.0                | 98.99              | 804.7207     | 827.7101   | 0.4          | ↓ (0.67)                              |
| TG(47:2)            | C <sub>50</sub> H <sub>92</sub> O <sub>6</sub>   | [M+Na] <sup>+</sup>                 | 45.2  | 31.9                | 94.50              | 788.6894     | 811.6787   | 0.4          | ↓ (0.62)                              |
| HexCer(38:2)        | C <sub>44</sub> H <sub>83</sub> NO <sub>9</sub>  | [M+Na] <sup>+</sup>                 | 48.8  | 48.6                | 95.31              | 769.6068     | 792.5955   | 6.7          | ↑ (1.03)                              |
| SPH(18:0)           | C <sub>18</sub> H <sub>39</sub> NO <sub>2</sub>  | [M-H <sub>2</sub> O+H] <sup>+</sup> | 46.0  | 33.5                | 99.21              | 301.2981     | 284.2958   | 3.4          | ↓ (0.94)                              |
| Hexadecadienol      | C <sub>16</sub> H <sub>33</sub> NO               | [M+NH <sub>4</sub> ] <sup>+</sup>   | 43.4  | 20.0                | 99.01              | 238.2301     | 256.2645   | 2.0          | ↓ (0.93)                              |

HexCer (Hexosylceramide); TG(Triacylglycerol), SPH (Sphingoid Base)

Fold Change = Medicated PD (Intensity) / Control (Intensity)

**Table S5B.** A list of the database matches based upon accurate mass (Lipid Maps and METLIN, 10 ppm) for VIP compounds found only in drug naïve PD vs. control analysis (VIP > 1).

| Measured Feature    | Database Matches                               | Formula                                           | Adduct                              | Neutral Mass | $\Delta$ ppm | Expression Medicated PD (Fold Change) | Lipid Maps | METLIN |
|---------------------|------------------------------------------------|---------------------------------------------------|-------------------------------------|--------------|--------------|---------------------------------------|------------|--------|
| <i>m/z</i> 664.6213 | Acer(42:1);O2                                  | C <sub>42</sub> H <sub>81</sub> NO <sub>4</sub>   | [M+H] <sup>+</sup>                  | 663.6160     | 3.8          | ↓ (0.46)                              | ✓          |        |
|                     | HexCer(36:1);O*                                |                                                   |                                     |              |              |                                       | ✓          |        |
|                     | Cer(42:2);O3*                                  |                                                   |                                     |              |              |                                       | ✓          |        |
|                     | ACer(42:0)O3                                   | C <sub>42</sub> H <sub>83</sub> NO <sub>5</sub>   | [M-H <sub>2</sub> O+H] <sup>+</sup> | 681.6265     | 3.8          |                                       | ✓          |        |
|                     | Cer(42:1);O4*                                  |                                                   |                                     |              |              |                                       | ✓          |        |
|                     | DG O(39:3)                                     | C <sub>42</sub> H <sub>78</sub> O <sub>4</sub>    | [M+NH <sub>4</sub> ] <sup>+</sup>   | 646.5894     | 3.8          |                                       | ✓          |        |
| <i>m/z</i> 641.4795 | CAR(28:4);O4                                   | C <sub>35</sub> H <sub>61</sub> NO <sub>8</sub>   | [M+NH <sub>4</sub> ] <sup>+</sup>   | 623.4391     | 9.4          | ↑ (1.07)                              | ✓          |        |
|                     | HexCer(29:4);O2                                |                                                   |                                     |              |              |                                       | ✓          |        |
|                     | ST 27:0;HexNAc                                 |                                                   |                                     |              |              |                                       | ✓          |        |
|                     | LPG O(27:0);O                                  | C <sub>33</sub> H <sub>69</sub> O <sub>9</sub> P  | [M+H] <sup>+</sup>                  | 640.4657     | 6.7          |                                       | ✓          |        |
|                     | CE(11:0);O4                                    | C <sub>38</sub> H <sub>66</sub> O <sub>6</sub>    | [M+Na] <sup>+</sup>                 | 618.4837     | 6.7          |                                       | ✓          |        |
|                     | DG(35:4);O                                     |                                                   |                                     |              |              |                                       | ✓          |        |
|                     | DG O(35:5);O2                                  |                                                   |                                     |              |              |                                       | ✓          |        |
|                     | TG(35:3)                                       |                                                   |                                     |              |              |                                       | ✓          |        |
|                     | TG O(35:4);O                                   |                                                   |                                     |              |              |                                       | ✓          |        |
|                     | NAT(30:0);O4                                   | C <sub>32</sub> H <sub>65</sub> NO <sub>8</sub> S | [M+NH <sub>4</sub> ] <sup>+</sup>   | 623.4391     | 4.1          |                                       | ✓          |        |
|                     | CE(13:3);O4                                    | C <sub>40</sub> H <sub>64</sub> O <sub>6</sub>    | [M+H] <sup>+</sup>                  | 640.4657     | 3.0          |                                       | ✓          |        |
|                     | DG(37:7);O                                     |                                                   |                                     |              |              |                                       | ✓          |        |
|                     | DG O(37:8);O2                                  |                                                   |                                     |              |              |                                       | ✓          |        |
|                     | TG(37:6)                                       |                                                   |                                     |              |              |                                       | ✓          |        |
|                     | TG O(37:7);O                                   |                                                   |                                     |              |              |                                       | ✓          |        |
| DG(37:6);O2         | C <sub>40</sub> H <sub>66</sub> O <sub>7</sub> |                                                   |                                     |              |              | [M-H <sub>2</sub> O+H] <sup>+</sup>   | 658.4762   | 3.0    |

|                     |                                     |                                                   |                                     |          |     |          |   |   |
|---------------------|-------------------------------------|---------------------------------------------------|-------------------------------------|----------|-----|----------|---|---|
|                     | TG(37:5);O                          |                                                   |                                     |          |     |          | ✓ |   |
|                     | TG O(37:6);O <sub>2</sub>           |                                                   |                                     |          |     |          | ✓ |   |
| <i>m/z</i> 553.4300 | NAT(26:0);O <sub>2</sub>            | C <sub>28</sub> H <sub>57</sub> NO <sub>6</sub> S | [M+NH <sub>4</sub> ] <sup>+</sup>   | 535.3901 | 9.9 | ↑ (1.04) | ✓ |   |
|                     | DG O(33:8)                          | C <sub>36</sub> H <sub>56</sub> O <sub>4</sub>    | [M+H] <sup>+</sup>                  | 552.4167 | 8.9 |          | ✓ |   |
|                     | DG(33:6)                            | C <sub>36</sub> H <sub>58</sub> O <sub>5</sub>    | [M-H <sub>2</sub> O+H] <sup>+</sup> | 570.4272 | 8.9 |          | ✓ |   |
|                     | DG O(33:7);O                        |                                                   |                                     |          |     |          | ✓ |   |
|                     | MG(33:7);O                          |                                                   |                                     |          |     |          | ✓ |   |
|                     | TG O(33:6)                          |                                                   |                                     |          |     |          | ✓ |   |
|                     | CerP(28:0);O <sub>2</sub>           | C <sub>28</sub> H <sub>58</sub> NO <sub>6</sub> P | [M+NH <sub>4</sub> ] <sup>+</sup>   | 535.3901 | 7.2 |          | ✓ |   |
|                     | LPC O(20:1)*                        |                                                   |                                     |          |     |          | ✓ |   |
|                     | LPE O(23:1)                         |                                                   |                                     |          |     |          | ✓ |   |
|                     | PC(20:0)                            |                                                   |                                     |          |     |          | ✓ | ✓ |
| PC(20:1)            |                                     |                                                   |                                     |          |     | ✓        |   |   |
| <i>m/z</i> 402.3932 | FA(24:0);O*                         | C <sub>24</sub> H <sub>48</sub> O <sub>3</sub>    | [M+NH <sub>4</sub> ] <sup>+</sup>   | 535.3901 | 2.5 | ↓ (0.54) | ✓ | ✓ |
|                     | MG O(21:1)                          |                                                   |                                     |          |     |          | ✓ |   |
| <i>m/z</i> 338.3426 | NAE(20:0)*                          | C <sub>22</sub> H <sub>45</sub> NO <sub>2</sub>   | [M-H <sub>2</sub> O+H] <sup>+</sup> | 570.4272 | 2.7 | ↓ (0.88) | ✓ | ✓ |
|                     | Docosenamide                        | C <sub>22</sub> H <sub>43</sub> NO                | [M+H] <sup>+</sup>                  | 337.3345 | 2.5 |          | ✓ | ✓ |
|                     | Cyclohexanecarbon-ylpentadecylamine |                                                   |                                     |          |     |          | ✓ | ✓ |
| <i>m/z</i> 369.3836 | -                                   | -                                                 | -                                   | -        | -   | ↓ (1.02) |   |   |
| <i>m/z</i> 340.3935 | -                                   | -                                                 | -                                   | -        | -   | ↓ (0.11) |   |   |

ACer (O-Acyl Ceramide); Cer (Ceramide); DG O (Alkylacylglycerol); CAR (Acyl Carnitine); HexCer (Glucosylceramide); ST;HexNAc (Sterol N-Acetyl-Hexosamine conjugates); LPG O (Monoalkylglycerophosphoglycerol); CE (Cholesterol Esters); DG (Diacylglycerol); TG (Triacylglycerol); TG O (alkyldiacylglycerol); NAT (N-Acyl Taurine); MG (Monoacylglycerol); CerP (Ceramide Phosphate); LPC O (Monoalkylglycerophosphocholine); LPE O (Monoalkylglycerophosphoethanolamine); NAE (N-Acyl Ethanolamine)

The number of oxygen atoms that are not included in the class-specific functional group is added after the semi-colon, where applicable

Lipid ID \* corresponds to a Lipid Maps Structure Database (LMSD) hit which comprises only biologically relevant lipids to mammalian species. All other database matches correspond to Lipid Maps Computationally-generated species (COMP\_DB) and METLIN as indicated in the final two columns

Fold Change = Medicated PD (Intensity) / Control (Intensity)

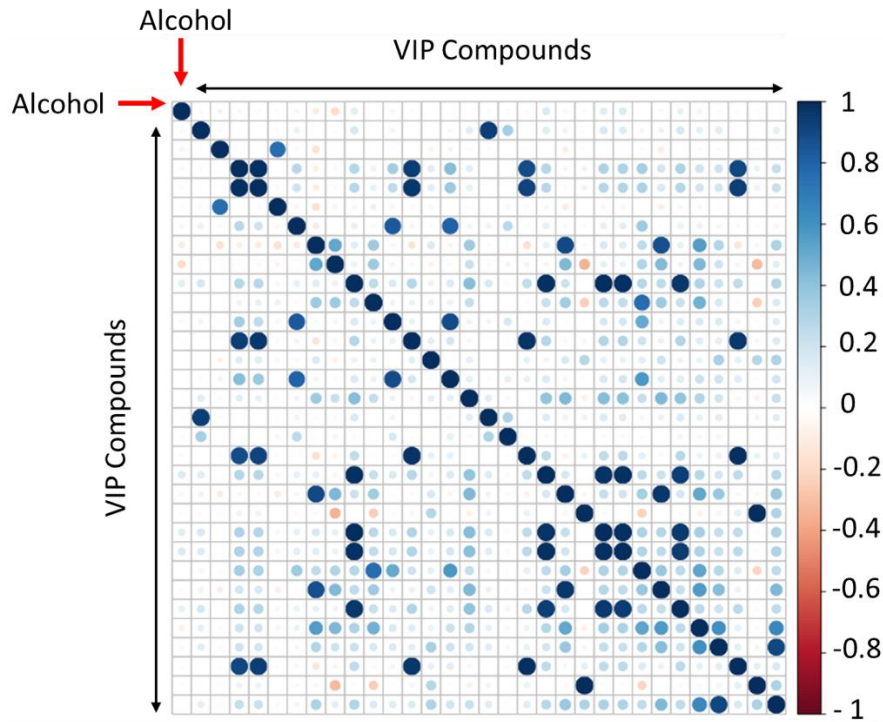

**Figure S3.** Pearson's correlation matrix displaying the relationship between the number of alcohol units consumed per participant and the intensity of each corresponding VIP compound from PLS-DA modelling. The size of each circle corresponds to the  $p$ -value and the colour relates to Pearson's  $R$  value, a strong correlation would yield either a 1 (deep blue) or -1 (deep red) association. The plot displays that there are relationships between VIP compounds but not between any specific compound and alcohol intake. This is highlighted by the lack of circles in the first row or column which both correspond to alcohol.

**Table S6.** Mummichog output from MetaboAnalyst analysis for pathways with  $p < 0.05$  in drug naïve PD vs. control cohorts

| Pathway                                    | Pathway Size ( $n=$ ) | Metabolite Hits ( $n=$ ) | Significant Metabolite Hits ( $n=$ ) | $p$ -value | gamma- $p$ | Enrichment Factor |
|--------------------------------------------|-----------------------|--------------------------|--------------------------------------|------------|------------|-------------------|
| Carnitine shuttle                          | 72                    | 26                       | 14                                   | 0.002      | 0.007      | 1.69              |
| Valine, leucine and isoleucine degradation | 40                    | 15                       | 11                                   | 0.003      | 0.014      | 1.19              |
| Fatty acid biosynthesis                    | 49                    | 7                        | 6                                    | 0.010      | 0.061      | 0.53              |
| Sphingolipid metabolism                    | 25                    | 7                        | 6                                    | 0.010      | 0.061      | 1.04              |
| Arachidonic acid metabolism                | 62                    | 11                       | 8                                    | 0.014      | 0.056      | 0.74              |
| Primary bile acid biosynthesis             | 47                    | 8                        | 6                                    | 0.028      | 0.115      | 0.52              |
| Fatty acid metabolism                      | 50                    | 10                       | 7                                    | 0.029      | 0.104      | 1.12              |
| Ether lipid metabolism                     | 23                    | 2                        | 2                                    | 0.038      | 0.351      | 0.69              |
| Vitamin E metabolism                       | 54                    | 37                       | 23                                   | 0.038      | 0.075      | 2.08              |

**Table S7.** Mummichog output from MetaboAnalyst analysis for pathways with  $p < 0.05$  in medicated PD vs. control cohorts

| Pathway                                                      | Pathway Size (n=) | Metabolite Hits (n=) | Significant Metabolite Hits (n=) | p-value               | gamma-p               | Enrichment Factor |
|--------------------------------------------------------------|-------------------|----------------------|----------------------------------|-----------------------|-----------------------|-------------------|
| Steroid hormone biosynthesis                                 | 99                | 29                   | 26                               | $5.02 \times 10^{-9}$ | $5.64 \times 10^{-8}$ | 1.09              |
| Carnitine shuttle                                            | 72                | 26                   | 12                               | $5.09 \times 10^{-5}$ | $2.04 \times 10^{-3}$ | 2.21              |
| Arachidonic acid metabolism                                  | 62                | 11                   | 8                                | $3.09 \times 10^{-4}$ | $2.44 \times 10^{-3}$ | 0.96              |
| Retinol metabolism                                           | 22                | 8                    | 6                                | 0.003                 | 0.133                 | 1.13              |
| Sphingolipid metabolism                                      | 25                | 7                    | 4                                | 0.017                 | 0.093                 | 1.50              |
| Prostaglandin formation from dihomo- $\gamma$ -linoleic acid | 11                | 5                    | 3                                | 0.038                 | 0.205                 | 3.61              |



**Table S8.** Details of the collecting sites in the UK/NL and the lead PI at each site

| Site number | Site name                                                                 | PI                  |
|-------------|---------------------------------------------------------------------------|---------------------|
| 1           | Addenbrookes (Cambridge)                                                  | Paul Worth          |
| 2           | Bournemouth                                                               | Khaled Amar         |
| 3           | Cornwall/Truro                                                            | Christine Schofield |
| 4           | Lothian - Western General Edinburgh                                       | Gordon Duncan       |
| 5           | Edinburgh – Royal Infirmary of Edinburgh                                  | Gordon Duncan       |
| 6           | Edinburgh - Primary Care NHS Lothian (Seb Derm)                           | Richard Weller      |
| 7           | Hampshire                                                                 | Sam Arianayagam     |
| 8           | Nottingham                                                                | Gill Sare           |
| 9           | Pennine                                                                   | Jason Raw           |
| 10          | Salford                                                                   | Monty Silverdale    |
| 11          | Salisbury                                                                 | Diran Padiachy      |
| 12          | Sheffield                                                                 | Oliver Bandmann     |
| 13          | South Tees                                                                | Neil Archibold      |
| 14          | Southern Health                                                           | Helen Roberts       |
| 15          | Luton & Dunstable                                                         | Anette Schrag       |
| 16          | Portsmouth                                                                | Sean Slaght         |
| 17          | Northumbria                                                               | Richard Walker      |
| 18          | London North West                                                         | Sophie Molloy       |
| 19          | Bath                                                                      | Veronica Lyell      |
| 20          | Gateshead                                                                 | Richard Athey       |
| 21          | Sunderland                                                                | Uma Nath            |
| 22          | Plymouth                                                                  | Camille Caroll      |
| 23          | Newcastle Upon Tyne Hospitals NHS Foundation Trust (Newcastle University) | Nicola Pavese       |
| 24          | Royal Devon and Exeter NHS Foundation Trust                               | Robert James        |
| 25          | Imperial College Healthcare NHS Trust                                     | Sophie Molloy       |
| 26          | LEAP Trial, The Netherlands                                               | Sven Suwijn         |
